# Supplementary material for: A calibrated diversity assay for nucleic acid libraries using DiStRO—a Diversity Standard of Random Oligonucleotides
Source: PubMed Central journal article supplement — Nucleic Acids Res. 2009 Dec 3;38(4):e23. doi: 10.1093/nar/gkp1108 (PMC2831324; doi:10.1093/nar/gkp1108), 2009-12-03
Supplement: gkp1108_1.pdf [file gkp1108_1.pdf]

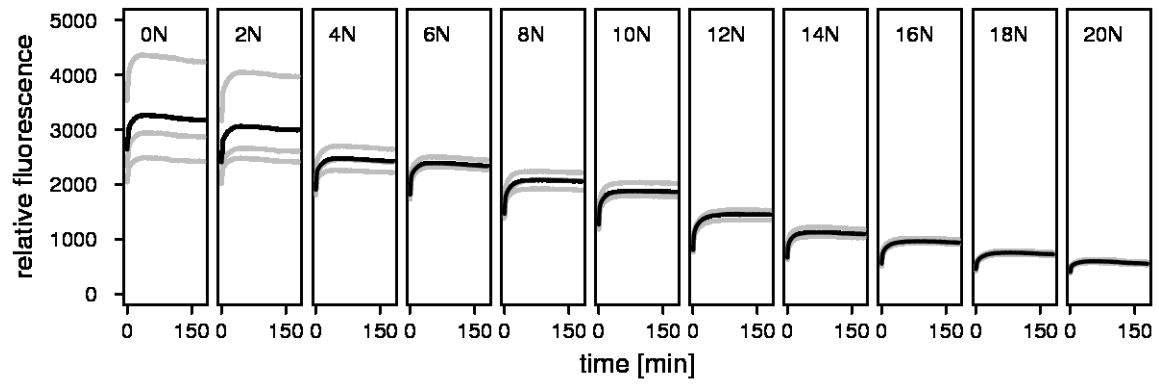

Supplement figure 1: Reannealing kinetics of triplicate samples for varying diversities (0-22N) at 76°C. Black curve corresponds to mean values.

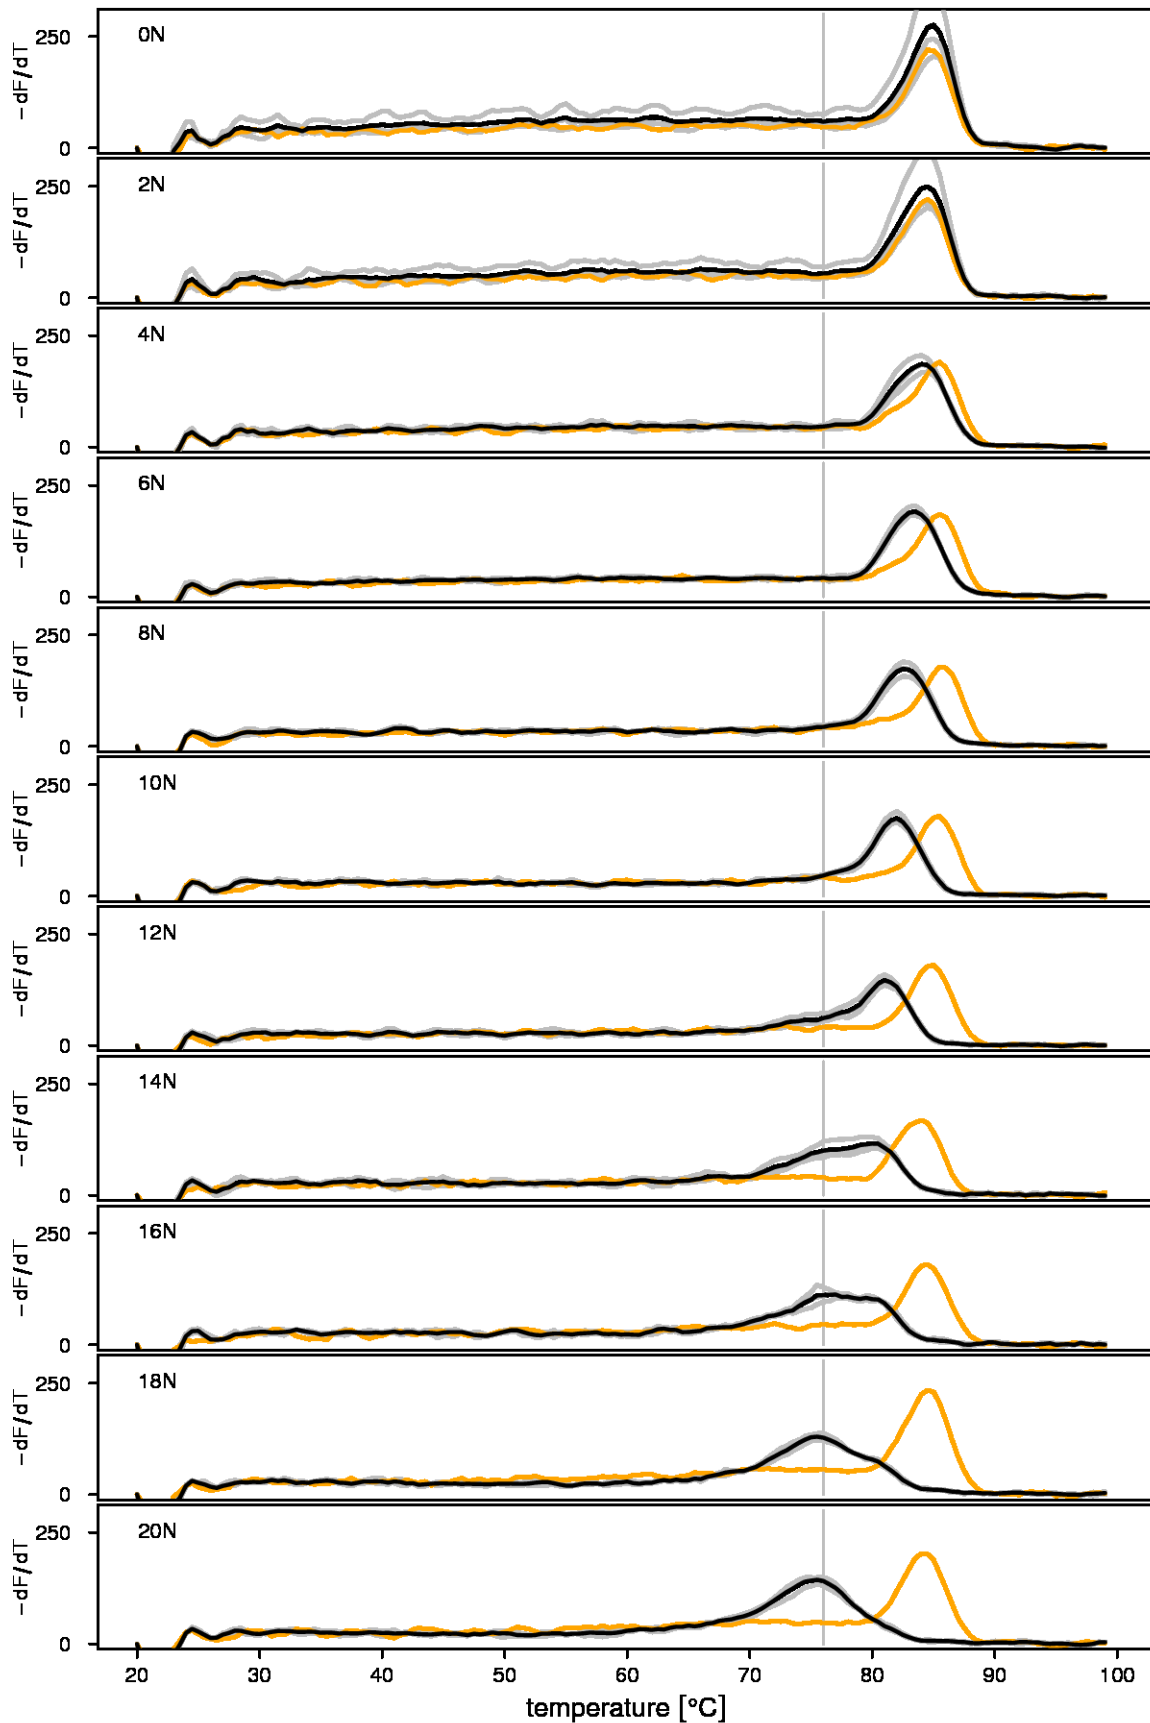

Supplement figure 2: Remelting kinetics of triplicate samples for varying diversities (0-22N). Black curve corresponds to the mean values and orange curve denotes the corresponding unmelted sample. Grey line indicates initial annealing temperature.

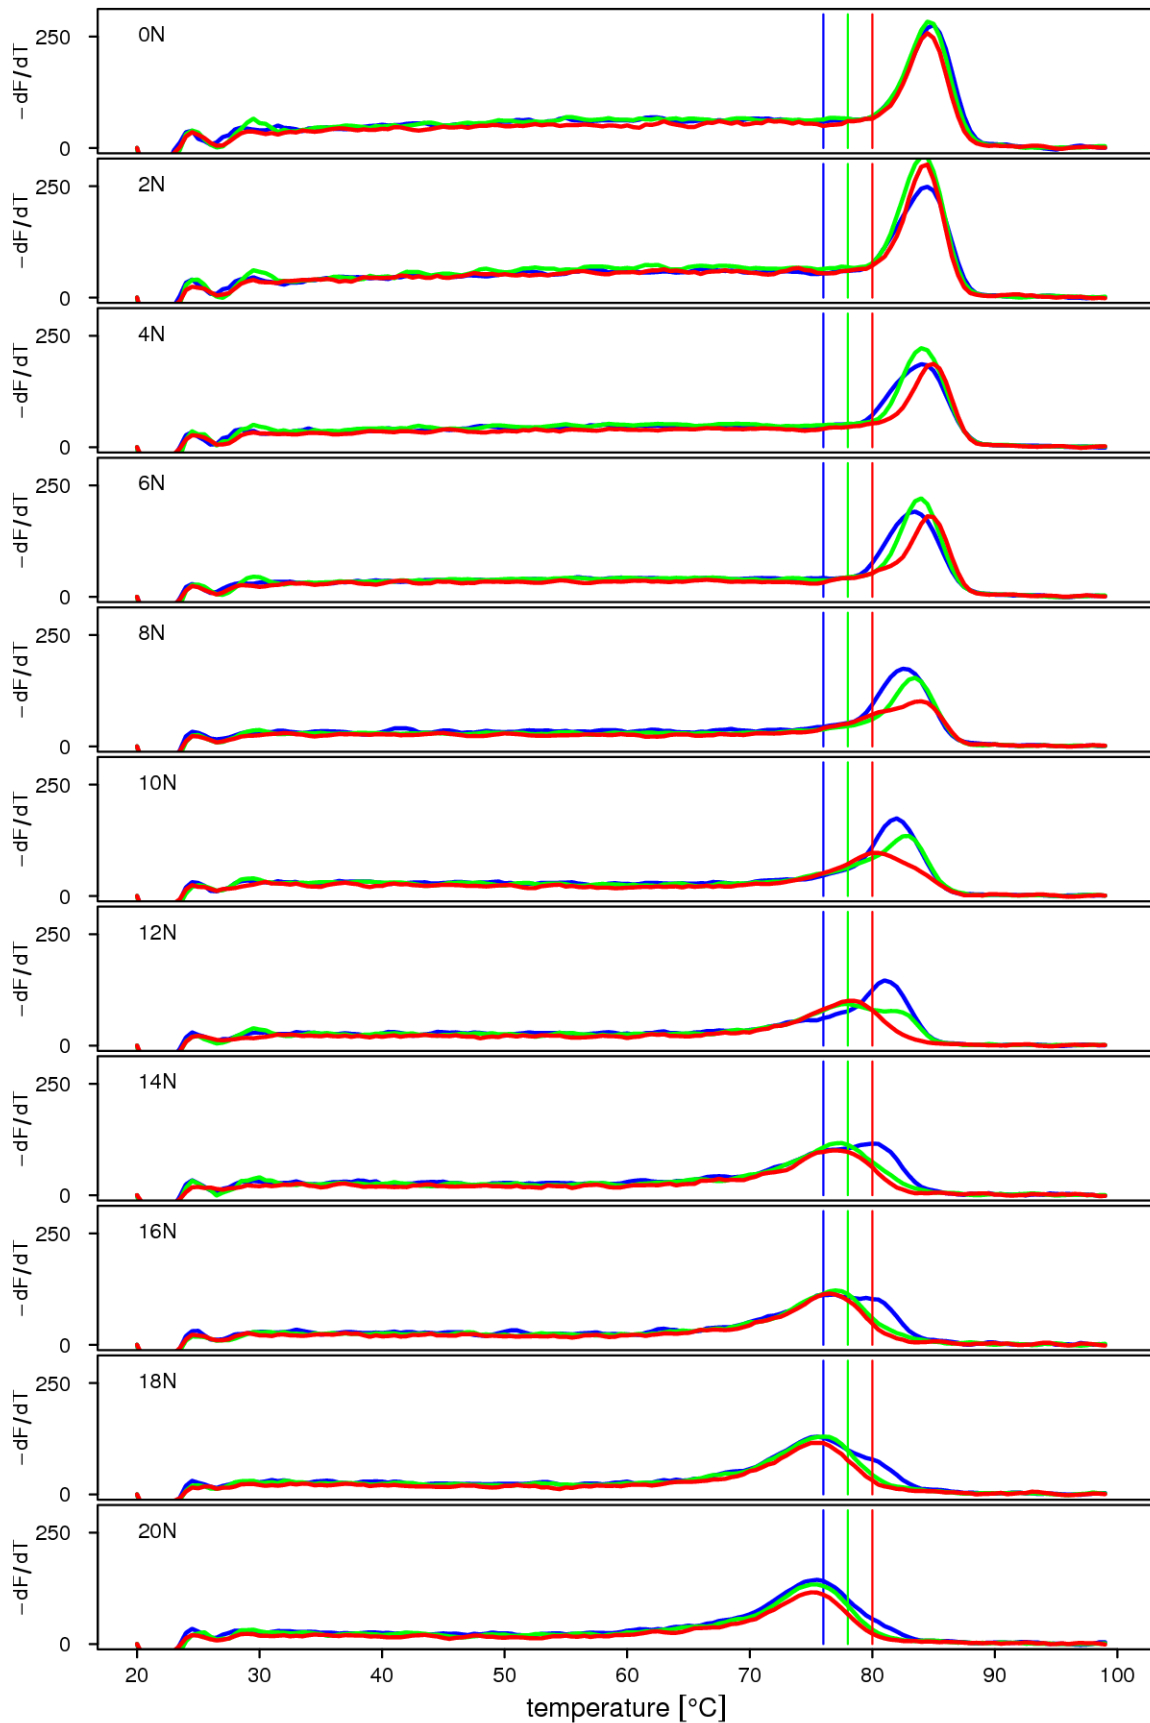

Supplement figure 3: Comparison of different annealing temperatures in the remelting assay for different diversities (0-22N). 76°C, blue; 78°C, green; 80°C, red. Vertical lines indicate the respective annealing temperatures.
